# Supplementary material for: HSPA6 is Correlated With the Malignant Progression and Immune Microenvironment of Gliomas
Source: Front Cell Dev Biol. 2022 Feb 23;10:833938. doi: 10.3389/fcell.2022.833938 (PMC8904718; doi:10.3389/fcell.2022.833938)
Supplement: Supplementary file 1 [file Table2.XLSX]

## Sheet: Sheet1
Supplementary Table 2: 182 members of the HSPs superfamily in the human genome
Org_name	GeneID	Symbol	description	map_location	chromosome
Homo sapiens	10598	AHSA1	activator of Hsp90 ATPase activity 1	14q24	14
Homo sapiens	3301	DNAJA1	DnaJ heat shock protein family (Hsp40) member A1	9p13.3	9
Homo sapiens	100129308	DNAJA1P1	DnaJ heat shock protein family (Hsp40) member A1 pseudogene 1	13q21.1	13
Homo sapiens	100131207	DNAJA1P2	DnaJ heat shock protein family (Hsp40) member A1 pseudogene 2	2q23.3	2
Homo sapiens	644588	DNAJA1P3	DnaJ heat shock protein family (Hsp40) member A1 pseudogene 3	Xq22.3	X
Homo sapiens	728614	DNAJA1P4	DnaJ heat shock protein family (Hsp40) member A1 pseudogene 4	6q22.1	6
Homo sapiens	94236	DNAJA1P5	DnaJ heat shock protein family (Hsp40) member A1 pseudogene 5	1p22	1
Homo sapiens	100421542	DNAJA1P6	DnaJ heat shock protein family (Hsp40) member A1 pseudogene 6		22
Homo sapiens	10294	DNAJA2	DnaJ heat shock protein family (Hsp40) member A2	16q12.1	16
Homo sapiens	9093	DNAJA3	DnaJ heat shock protein family (Hsp40) member A3	16p13.3	16
Homo sapiens	55466	DNAJA4	DnaJ heat shock protein family (Hsp40) member A4	15q25.1	15
Homo sapiens	3337	DNAJB1	DnaJ heat shock protein family (Hsp40) member B1	19p13.2	19
Homo sapiens	51726	DNAJB11	DnaJ heat shock protein family (Hsp40) member B11	3q27.3	3
Homo sapiens	54788	DNAJB12	DnaJ heat shock protein family (Hsp40) member B12	10q22.1	10
Homo sapiens	374407	DNAJB13	DnaJ heat shock protein family (Hsp40) member B13	11q13.4	11
Homo sapiens	79982	DNAJB14	DnaJ heat shock protein family (Hsp40) member B14	4q23	4
Homo sapiens	171221	DNAJB1P1	DnaJ heat shock protein family (Hsp40) member B1 pseudogene 1	2q32.3	2
Homo sapiens	3300	DNAJB2	DnaJ heat shock protein family (Hsp40) member B2	2q35	2
Homo sapiens	414061	DNAJB3	DnaJ heat shock protein family (Hsp40) member B3	2q37	2
Homo sapiens	11080	DNAJB4	DnaJ heat shock protein family (Hsp40) member B4	1p31.1	1
Homo sapiens	25822	DNAJB5	DnaJ heat shock protein family (Hsp40) member B5	9p13.3	9
Homo sapiens	100421411	DNAJB5P1	DnaJ heat shock protein family (Hsp40) member B5 pseudogene 1		9
Homo sapiens	10049	DNAJB6	DnaJ heat shock protein family (Hsp40) member B6	7q36.3	7
Homo sapiens	150353	DNAJB7	DnaJ heat shock protein family (Hsp40) member B7	22q13.2	22
Homo sapiens	165721	DNAJB8	DnaJ heat shock protein family (Hsp40) member B8	3q21.3	3
Homo sapiens	4189	DNAJB9	DnaJ heat shock protein family (Hsp40) member B9	14q24.2-q24.3	7
Homo sapiens	64215	DNAJC1	DnaJ heat shock protein family (Hsp40) member C1	10p12.31	10
Homo sapiens	54431	DNAJC10	DnaJ heat shock protein family (Hsp40) member C10	2q32.1	2
Homo sapiens	55735	DNAJC11	DnaJ heat shock protein family (Hsp40) member C11	1p36.31	1
Homo sapiens	56521	DNAJC12	DnaJ heat shock protein family (Hsp40) member C12	10q22.1	10
Homo sapiens	23317	DNAJC13	DnaJ heat shock protein family (Hsp40) member C13	3q22.1	3
Homo sapiens	85406	DNAJC14	DnaJ heat shock protein family (Hsp40) member C14	12q13.2	12
Homo sapiens	29103	DNAJC15	DnaJ heat shock protein family (Hsp40) member C15	13q14.1	13
Homo sapiens	23341	DNAJC16	DnaJ heat shock protein family (Hsp40) member C16	1p36.1	1
Homo sapiens	55192	DNAJC17	DnaJ heat shock protein family (Hsp40) member C17	15q15.1	15
Homo sapiens	202052	DNAJC18	DnaJ heat shock protein family (Hsp40) member C18	5q31.2	5
Homo sapiens	131118	DNAJC19	DnaJ heat shock protein family (Hsp40) member C19	3q26.33	3
Homo sapiens	100129853	DNAJC19P1	DnaJ heat shock protein family (Hsp40) member C19 pseudogene 1	10q21.3	10
Homo sapiens	100861445	DNAJC19P2	DnaJ heat shock protein family (Hsp40) member C19 pseudogene 2	19q	19
Homo sapiens	100861443	DNAJC19P3	DnaJ heat shock protein family (Hsp40) member C19 pseudogene 3	19q	19
Homo sapiens	106480691	DNAJC19P4	DnaJ heat shock protein family (Hsp40) member C19 pseudogene 4	3p26.2	3
Homo sapiens	100861453	DNAJC19P5	DnaJ heat shock protein family (Hsp40) member C19 pseudogene 5	2q	2
Homo sapiens	100861449	DNAJC19P6	DnaJ heat shock protein family (Hsp40) member C19 pseudogene 6	6q	6
Homo sapiens	100861458	DNAJC19P7	DnaJ heat shock protein family (Hsp40) member C19 pseudogene 7	1p	1
Homo sapiens	100861455	DNAJC19P8	DnaJ heat shock protein family (Hsp40) member C19 pseudogene 8	1p	1
Homo sapiens	644589	DNAJC19P9	DnaJ heat shock protein family (Hsp40) member C19 pseudogene 9	14q21.2	14
Homo sapiens	27000	DNAJC2	DnaJ heat shock protein family (Hsp40) member C2	7q22	7
Homo sapiens	134218	DNAJC21	DnaJ heat shock protein family (Hsp40) member C21	5p13.2	5
Homo sapiens	79962	DNAJC22	DnaJ heat shock protein family (Hsp40) member C22	12q13.12	12
Homo sapiens	120526	DNAJC24	DnaJ heat shock protein family (Hsp40) member C24	11p13	11
Homo sapiens	548645	DNAJC25	DnaJ heat shock protein family (Hsp40) member C25	9q31.3	9
Homo sapiens	51277	DNAJC27	DnaJ heat shock protein family (Hsp40) member C27	2p23.3	2
Homo sapiens	54943	DNAJC28	DnaJ heat shock protein family (Hsp40) member C28	21q22.11	21
Homo sapiens	5611	DNAJC3	DnaJ heat shock protein family (Hsp40) member C3	13q32.1	13
Homo sapiens	84277	DNAJC30	DnaJ heat shock protein family (Hsp40) member C30	7q11.23	7
Homo sapiens	3338	DNAJC4	DnaJ heat shock protein family (Hsp40) member C4	11q13	11
Homo sapiens	80331	DNAJC5	DnaJ heat shock protein family (Hsp40) member C5	20q13.33	20
Homo sapiens	85479	DNAJC5B	DnaJ heat shock protein family (Hsp40) member C5 beta	8q13.1	8
Homo sapiens	285126	DNAJC5G	DnaJ heat shock protein family (Hsp40) member C5 gamma	2p23.3	2
Homo sapiens	9829	DNAJC6	DnaJ heat shock protein family (Hsp40) member C6	1p31.3	1
Homo sapiens	7266	DNAJC7	DnaJ heat shock protein family (Hsp40) member C7	17q21.2	17
Homo sapiens	22826	DNAJC8	DnaJ heat shock protein family (Hsp40) member C8	1p35.3	1
Homo sapiens	319111	DNAJC8P1	DnaJ heat shock protein family (Hsp40) member C8 pseudogene 1	14q13.2	14
Homo sapiens	23234	DNAJC9	DnaJ heat shock protein family (Hsp40) member C9	10q22.2	10
Homo sapiens	51501	HIKESHI	Hikeshi, heat shock protein nuclear import factor	11q14.2	11
Homo sapiens	3320	HSP90AA1	heat shock protein 90 alpha family class A member 1	14q32.33	14
Homo sapiens	3324	HSP90AA2P	heat shock protein 90 alpha family class A member 2, pseudogene	11p14.1	11
Homo sapiens	3322	HSP90AA3P	heat shock protein 90 alpha family class A member 3, pseudogene	1q23.1	1
Homo sapiens	3323	HSP90AA4P	heat shock protein 90 alpha family class A member 4, pseudogene	4q35.2	4
Homo sapiens	730211	HSP90AA5P	heat shock protein 90 alpha family class A member 5, pseudogene	3q27.1	3
Homo sapiens	441051	HSP90AA6P	heat shock protein 90 alpha family class A member 6, pseudogene	4q33	4
Homo sapiens	3326	HSP90AB1	heat shock protein 90 alpha family class B member 1	6p12	6
Homo sapiens	391634	HSP90AB2P	heat shock protein 90 alpha family class B member 2, pseudogene	4p15.33	4
Homo sapiens	3327	HSP90AB3P	heat shock protein 90 alpha family class B member 3, pseudogene	4q22.1	4
Homo sapiens	664618	HSP90AB4P	heat shock protein 90 alpha family class B member 4, pseudogene	15q22.1	15
Homo sapiens	442083	HSP90AB5P	heat shock protein 90 alpha family class B member 5, pseudogene	3p13	3
Homo sapiens	541611	HSP90AB6P	heat shock protein 90 alpha family class B member 6, pseudogene	13q32.1	13
Homo sapiens	644495	HSP90AB7P	heat shock protein 90 alpha family class B member 7, pseudogene	10p14	10
Homo sapiens	7184	HSP90B1	heat shock protein 90 beta family member 1	12q24.2-q24.3	12
Homo sapiens	7190	HSP90B2P	heat shock protein 90 beta family member 2, pseudogene	15q26.3	15
Homo sapiens	343477	HSP90B3P	heat shock protein 90 beta family member 3, pseudogene	1p22.1	1
Homo sapiens	259217	HSPA12A	heat shock protein family A (Hsp70) member 12A	10q26.12	10
Homo sapiens	116835	HSPA12B	heat shock protein family A (Hsp70) member 12B	20p13	20
Homo sapiens	6782	HSPA13	heat shock protein family A (Hsp70) member 13	21q11	21
Homo sapiens	51182	HSPA14	heat shock protein family A (Hsp70) member 14	10p13	10
Homo sapiens	3303	HSPA1A	heat shock protein family A (Hsp70) member 1A	6p21.3	6
Homo sapiens	3304	HSPA1B	heat shock protein family A (Hsp70) member 1B	6p21.3	6
Homo sapiens	3305	HSPA1L	heat shock protein family A (Hsp70) member 1 like	6p21.3	6
Homo sapiens	3306	HSPA2	heat shock protein family A (Hsp70) member 2	14q24.1	14
Homo sapiens	3308	HSPA4	heat shock protein family A (Hsp70) member 4	5q31.1	5
Homo sapiens	22824	HSPA4L	heat shock protein family A (Hsp70) member 4 like	4q28	4
Homo sapiens	3309	HSPA5	heat shock protein family A (Hsp70) member 5	9q33.3	9
Homo sapiens	3310	HSPA6	heat shock protein family A (Hsp70) member 6	1q23	1
Homo sapiens	3311	HSPA7	heat shock protein family A (Hsp70) member 7	1q23.3	1
Homo sapiens	3312	HSPA8	heat shock protein family A (Hsp70) member 8	11q24.1	11
Homo sapiens	3314	HSPA8P1	heat shock protein family A (Hsp70) member 8 pseudogene 1	Xq24	X
Homo sapiens	100420004	HSPA8P10	heat shock protein family A (Hsp70) member 8 pseudogene 10		2
Homo sapiens	392209	HSPA8P11	heat shock protein family A (Hsp70) member 8 pseudogene 11	8p12	8
Homo sapiens	100420038	HSPA8P12	heat shock protein family A (Hsp70) member 8 pseudogene 12		4
Homo sapiens	106480803	HSPA8P13	heat shock protein family A (Hsp70) member 8 pseudogene 13	8q11.1	8
Homo sapiens	642580	HSPA8P14	heat shock protein family A (Hsp70) member 8 pseudogene 14	12q24.12	12
Homo sapiens	100420051	HSPA8P15	heat shock protein family A (Hsp70) member 8 pseudogene 15		6
Homo sapiens	100289643	HSPA8P16	heat shock protein family A (Hsp70) member 8 pseudogene 16	7q21.11	7
Homo sapiens	100533658	HSPA8P17	heat shock protein family A (Hsp70) member 8 pseudogene 17		9
Homo sapiens	402125	HSPA8P18	heat shock protein family A (Hsp70) member 8 pseudogene 18	3p24.3	3
Homo sapiens	100420049	HSPA8P19	heat shock protein family A (Hsp70) member pseudogene 19		3
Homo sapiens	100420133	HSPA8P2	heat shock protein family A (Hsp70) member 8 pseudogene 2		13
Homo sapiens	100129231	HSPA8P20	heat shock protein family A (Hsp70) member 8 pseudogene 20	Xq25	X
Homo sapiens	100420143	HSPA8P3	heat shock protein family A (Hsp70) member 8 pseudogene 3		10
Homo sapiens	100420028	HSPA8P4	heat shock protein family A (Hsp70) member 8 pseudogene 4		5
Homo sapiens	399988	HSPA8P5	heat shock protein family A (Hsp70) member 8 pseudogene 5	12p13.32	12
Homo sapiens	130195	HSPA8P6	heat shock protein family A (Hsp70) member 8 pseudogene 6	2q34	2
Homo sapiens	100420080	HSPA8P7	heat shock protein family A (Hsp70) member 8 pseudogene 7		X
Homo sapiens	100287551	HSPA8P8	heat shock protein family A (Hsp70) member 8 pseudogene 8	7p21.3	7
Homo sapiens	402143	HSPA8P9	heat shock protein family A (Hsp70) member 8 pseudogene 9	3q22.3	3
Homo sapiens	3313	HSPA9	heat shock protein family A (Hsp70) member 9	5q31.1	5
Homo sapiens	266724	HSPA9P1	heat shock protein family A (Hsp70) member 9 pseudogene 1	2q36.3	2
Homo sapiens	100873903	HSPA9P2	heat shock protein family A (Hsp70) member 9 pseudogene 2		18
Homo sapiens	3315	HSPB1	heat shock protein family B (small) member 1	7q11.23	7
Homo sapiens	51668	HSPB11	heat shock protein family B (small) member 11	1p32	1
Homo sapiens	653553	HSPB1P1	heat shock protein family B (small) member 1 pseudogene 1	9q21.13	9
Homo sapiens	653364	HSPB1P2	heat shock protein family B (small) member 1 pseudogene 2	Xp11.23	X
Homo sapiens	3316	HSPB2	heat shock protein family B (small) member 2	11q23.1	11
Homo sapiens	8988	HSPB3	heat shock protein family B (small) member 3	5q11.2	5
Homo sapiens	126393	HSPB6	heat shock protein family B (small) member 6	19q13.12	19
Homo sapiens	27129	HSPB7	heat shock protein family B (small) member 7	1p36.13	1
Homo sapiens	26353	HSPB8	heat shock protein family B (small) member 8	12q24.23	12
Homo sapiens	94086	HSPB9	heat shock protein family B (small) member 9	17q21.2	17
Homo sapiens	79663	HSPBAP1	HSPB1 associated protein 1	3q21.1	3
Homo sapiens	23640	HSPBP1	HSPA (Hsp70) binding protein 1	19q13.42	19
Homo sapiens	3329	HSPD1	heat shock protein family D (Hsp60) member 1	2q33.1	2
Homo sapiens	643300	HSPD1P1	heat shock protein family D (Hsp60) member 1 pseudogene 1	5p14.3	5
Homo sapiens	644016	HSPD1P10	heat shock protein family D (Hsp60) member 1 pseudogene 10	6q15	6
Homo sapiens	100359396	HSPD1P11	heat shock protein family D (Hsp60) member 1 pseudogene 11	5q15	5
Homo sapiens	283320	HSPD1P12	heat shock protein family D (Hsp60) member 1 pseudogene 12	12p13.31	12
Homo sapiens	100462987	HSPD1P13	heat shock protein family D (Hsp60) member 1 pseudogene 13		11
Homo sapiens	100287140	HSPD1P14	heat shock protein family D (Hsp60) member 1 pseudogene 14	1p35.1	1
Homo sapiens	646273	HSPD1P15	heat shock protein family D (Hsp60) member 1 pseudogene 15	5p14.3	5
Homo sapiens	100462985	HSPD1P16	heat shock protein family D (Hsp60) member 1 pseudogene 16		6
Homo sapiens	100462986	HSPD1P17	heat shock protein family D (Hsp60) member 1 pseudogene 17		10
Homo sapiens	100359397	HSPD1P18	heat shock protein family D (Hsp60) member 1 pseudogene 18	5q31.1	5
Homo sapiens	100463288	HSPD1P19	heat shock protein family D (Hsp60) member 1 pseudogene 19		20
Homo sapiens	645808	HSPD1P2	heat shock protein family D (Hsp60) member 1 pseudogene 2	8p23.1	8
Homo sapiens	100462989	HSPD1P20	heat shock protein family D (Hsp60) member 1 pseudogene 20		12
Homo sapiens	100462990	HSPD1P21	heat shock protein family D (Hsp60) member 1 pseudogene 21		20
Homo sapiens	100462984	HSPD1P22	heat shock protein family D (Hsp60) member 1 pseudogene 22		5
Homo sapiens	3332	HSPD1P3	heat shock protein family D (Hsp60) member 1 pseudogene 3	8p23.1	8
Homo sapiens	644745	HSPD1P4	heat shock protein family D (Hsp60) member 1 pseudogene 4	12q13.3	12
Homo sapiens	345041	HSPD1P5	heat shock protein family D (Hsp60) member 1 pseudogene 5	4q31.21	4
Homo sapiens	645548	HSPD1P6	heat shock protein family D (Hsp60) member 1 pseudogene 6	3p22.2	3
Homo sapiens	54047	HSPD1P7	heat shock protein family D (Hsp60) member 1 pseudogene 7	21q21.3	21
Homo sapiens	647298	HSPD1P8	heat shock protein family D (Hsp60) member 1 pseudogene 8	13q31.1	13
Homo sapiens	646910	HSPD1P9	heat shock protein family D (Hsp60) member 1 pseudogene 9	13q13.3	13
Homo sapiens	3336	HSPE1	heat shock protein family E (Hsp10) member 1	2q33.1	2
Homo sapiens	140895	HSPE1P1	heat shock protein family E (Hsp10) member 1 pseudogene 1	20q12	20
Homo sapiens	100288235	HSPE1P10	heat shock protein family E (Hsp10) member 1 pseudogene 10	5q23.2	5
Homo sapiens	106481673	HSPE1P11	heat shock protein family E (Hsp10) member 1 pseudogene 11	6p21.31	6
Homo sapiens	100286954	HSPE1P12	heat shock protein family E (Hsp10) member 1 pseudogene 12	12p13.2	12
Homo sapiens	106480256	HSPE1P13	heat shock protein family E (Hsp10) member 1 pseudogene 13	2p22.1	2
Homo sapiens	106481674	HSPE1P14	heat shock protein family E (Hsp10) member 1 pseudogene 14	8q22.3	8
Homo sapiens	171421	HSPE1P16	heat shock protein family E (Hsp10) member 1 pseudogene 16	16p12.1	16
Homo sapiens	106480257	HSPE1P18	heat shock protein family E (Hsp10) member 1 pseudogene 18	11q23.3	11
Homo sapiens	106481675	HSPE1P19	heat shock protein family E (Hsp10) member 1 pseudogene 19	3p11.1	3
Homo sapiens	326300	HSPE1P2	heat shock protein family E (Hsp10) member 1 pseudogene 2	14q23.2	14
Homo sapiens	100288726	HSPE1P20	heat shock protein family E (Hsp10) member 1 pseudogene 20	12q24.32	12
Homo sapiens	106480258	HSPE1P21	heat shock protein family E (Hsp10) member 1 pseudogene 21	6q23.2	6
Homo sapiens	100289607	HSPE1P22	heat shock protein family E (Hsp10) member 1 pseudogene 22	9q22.31	9
Homo sapiens	106481676	HSPE1P23	heat shock protein family E (Hsp10) member 1 pseudogene 23	4q13.3	4
Homo sapiens	106480259	HSPE1P24	heat shock protein family E (Hsp10) member 1 pseudogene 24	1p36.22	1
Homo sapiens	106480260	HSPE1P25	heat shock protein family E (Hsp10) member 1 pseudogene 25	1p31.1	1
Homo sapiens	106481677	HSPE1P26	heat shock protein family E (Hsp10) member 1 pseudogene 26	6q25.3	6
Homo sapiens	106480261	HSPE1P27	heat shock protein family E (Hsp10) member 1 pseudogene 27	1p36.12	1
Homo sapiens	171420	HSPE1P28	heat shock protein family E (Hsp10) member 1 pseudogene 28	9q32	9
Homo sapiens	100507046	HSPE1P3	heat shock protein family E (Hsp10) member 1 pseudogene 3		15
Homo sapiens	100287369	HSPE1P4	heat shock protein family E (Hsp10) member 1 pseudogene 4	12q23.2	12
Homo sapiens	100506000	HSPE1P5	heat shock protein family E (Hsp10) member 1 pseudogene 5		16
Homo sapiens	106480254	HSPE1P6	heat shock protein family E (Hsp10) member 1 pseudogene 6	1q32.1	1
Homo sapiens	100132346	HSPE1P7	heat shock protein family E (Hsp10) member 1 pseudogene 7	16q23.1	16
Homo sapiens	100292290	HSPE1P8	heat shock protein family E (Hsp10) member 1 pseudogene 8	1p34.3	1
Homo sapiens	106480255	HSPE1P9	heat shock protein family E (Hsp10) member 1 pseudogene 9	2q37.1	2
Homo sapiens	10808	HSPH1	heat shock protein family H (Hsp110) member 1	13q12.3	13
Homo sapiens	678656	ZRF1PS	DnaJ heat shock protein family (Hsp40) member C2 pseudogene	6p21.31-p21.1	6
